# Supplementary material for: The Influence of Parental Dietary Behaviors and Practices on Children’s Eating Habits
Source: Nutrients. 2021 Mar 30;13(4):1138. doi: 10.3390/nu13041138 (PMC8067332; doi:10.3390/nu13041138)
Supplement: Supplementary file 1 [file nutrients-13-01138-s001.pdf]

**Table S1.** Illustrates some studies assessing the influence of parental dietary behaviors on children's eating habits

| Author/year                                                 | Country   | Participant characteristics                                 | Study design        | Main outcome                                                                                                                                                                                         |
|-------------------------------------------------------------|-----------|-------------------------------------------------------------|---------------------|------------------------------------------------------------------------------------------------------------------------------------------------------------------------------------------------------|
| <b>(Longitudinal studies)</b>                               |           |                                                             |                     |                                                                                                                                                                                                      |
| <b>Lipsky, L., et al. (2015).</b><br><br><b>Ref. [56]</b>   | USA       | 2785 ethnically diverse American Students                   | Longitudinal study  | Fruit/vegetable intake frequency was associated positively with family meals ( $\beta \pm SE = 0.33 \pm 0.05$ ) and breakfast ( $0.18 \pm 0.03$ ), and inversely with fast food ( $-0.31 \pm 0.04$ ) |
| <b>Harbec, M., et al. (2018).</b><br><br><b>Ref. [16]</b>   | Australia | 1492 children<br>Age 6 and 10 years                         | Longitudinal study  | Children who had a better family meal environment at age of 6 years old, showed lower levels of soft-drinks consumption and higher levels of fitness when children reached 10 years of age           |
| <b>Galloway, A., et al. (2005).</b><br><br><b>Ref. [36]</b> | USA       | 173 (9-year-old) non-Hispanic white girls and their mothers | Longitudinal study  | Mothers who were less likely to pressure their children, were consuming more fruits and vegetables had daughters who were less picky and consumed more fruits and vegetables                         |
| <b>Sen, B., (2006).</b><br><br><b>Ref. [60]</b>             | USA       | 5014 ethnically diverse school students (boys and girls)    | Longitudinal survey | Positive association between high frequency of family meals and reduced incidence of obesity in the future                                                                                           |
| <b>Birch, L., et al. (2003).</b><br><br><b>Ref. [35]</b>    | USA       | 197 girls (ages 5, 7, 9 y) and their parents                | Longitudinal data   | Restricted parental feeding practice seemed to be related to overeating especially among preschool-age children ( $P < 0.001$ )                                                                      |

| (Cross-sectional studies)                               |             |                                                                  |                       |                                                                                                                                                                                                                     |
|---------------------------------------------------------|-------------|------------------------------------------------------------------|-----------------------|---------------------------------------------------------------------------------------------------------------------------------------------------------------------------------------------------------------------|
| <b>Utter, J., et al. (2007).</b><br><b>Ref. [5]</b>     | New Zealand | 3245 ethnically diverse school students (boys and girls)         | Cross-sectional study | Having meals at home with parents was associated to decreased skipped breakfast along with increased consumption of dairy products, fruits and vegetables (P<0.001)                                                 |
| <b>Fisher, L., et al. (2000).</b><br><b>Ref. [38]</b>   | USA         | 197 girls aged 4.6 to 6.4 years and their parents                | Cross-sectional study | When parents highly restrict energy-dense snacks from their children's diet hoping children choose healthful alternatives, children usually increase their desire for it and start to eat when they are not hungry. |
| <b>Hennessy, E., et al. (2012).</b><br><b>Ref. [37]</b> | USA         | Children partner schools (grades kindergarten through five, n83) | Cross-sectional study | Parental eating habits and feeding styles have been associated with children's snacking habits, the intake of dairy, high fat and sugar, fruits and vegetables                                                      |
| <b>Cheng, T., et al. (2008).</b><br><b>Ref. [66]</b>    | Australia   | 426 students aged 10-14 years (Boys & girls)                     | Cross-sectional study | Skipping breakfast among children were associated with the lack of perceived parental emphasis on breakfast                                                                                                         |
